# Supplementary material
Source: PubMed Central journal article supplement (PMC3586973)
Supplement: CJN.07900812_CJN07900812SupplementaryData.pdf [file CJN.07900812_CJN07900812SupplementaryData.pdf]

**Table 1. Association of Kidney Function Decline by eGFRcr (CKD Epi) with PWV & pulse pressure.**

| <b>PWV</b>              | <b>N</b> | <b>Unadjusted<br/>β(95% CI)</b> | <b>Demo adjusted*<br/>β(95% CI)</b> | <b>BP adjusted**<br/>β(95% CI)</b> | <b>Fully adjusted***<br/>β(95% CI)</b> | <b>†MAP adjusted (no<br/>SBP, DBP)<br/>β(95% CI)</b> |
|-------------------------|----------|---------------------------------|-------------------------------------|------------------------------------|----------------------------------------|------------------------------------------------------|
| <b>Continuous</b>       |          |                                 |                                     |                                    |                                        |                                                      |
| Log transformed         | 2057     | -0.33 (-0.54, -0.11) ‡          | -0.32 (-0.54, -0.10) ‡              | -0.32 (-0.53, -0.10) ‡             | -0.32 (-0.54, -0.10) ‡                 | -0.32 (-0.54, -0.10) ‡                               |
| <b>Quartiles</b>        |          |                                 |                                     |                                    |                                        |                                                      |
| <642                    | 525      | 0 (ref)                         | 0 (ref)                             | 0 (ref)                            | 0 (ref)                                | 0 (ref)                                              |
| 642-808                 | 529      | -0.11 (-0.33, 0.12)             | -0.10 (-0.33, 0.12)                 | -0.10 (-0.33, 0.13)                | -0.12 (-0.35, 0.11)                    | -0.12 (-0.35, 0.11)                                  |
| 809-1052                | 507      | -0.19 (-0.43, 0.04)             | -0.19 (-0.43, 0.04)                 | -0.19 (-0.42, 0.04)                | -0.24 (-0.48, 0.01)                    | -0.24 (-0.48, 0.001)                                 |
| >1052                   | 496      | -0.31 (-0.54, -0.07) ‡          | -0.30 (-0.54, -0.06) ‡              | -0.29 (-0.53, -0.05) ‡             | -0.29 (-0.53, -0.05) ‡                 | -0.29 (-0.53, -0.05) ‡                               |
| <b>Pulse Pressure</b>   |          |                                 |                                     |                                    |                                        |                                                      |
| Continuous (per 10mmHg) | 2057     | -0.07 (-0.12, -0.03) ‡          | -0.07 (-0.12, -0.03) ‡              | -0.07 (-0.12, -0.03) ‡             | -0.08 (-0.13, -0.03) ‡                 | -0.08 (-0.13, -0.03) ‡                               |
| <b>Quartiles</b>        |          |                                 |                                     |                                    |                                        |                                                      |
| <53                     | 529      | 0 (ref)                         | 0 (ref)                             | 0 (ref)                            | 0 (ref)                                | 0 (ref)                                              |
| 53-62                   | 503      | -0.22 (-0.45, 0.01)             | -0.21 (-0.44, 0.02)                 | -0.21 (-0.44, 0.02)                | -0.20 (-0.43, 0.04)                    | -0.20 (-0.43, 0.04)                                  |
| 63-75                   | 564      | -0.28 (-0.51, -0.05) ‡          | -0.28 (-0.51, -0.05) ‡              | -0.27 (-0.50, -0.04) ‡             | -0.28 (-0.51, -0.04) ‡                 | -0.28 (-0.51, -0.04) ‡                               |
| >75                     | 461      | -0.48 (-0.73, -0.23) ‡          | -0.47 (-0.71, -0.22) ‡              | -0.47 (-0.71, -0.22) ‡             | -0.47 (-0.72, -0.21) ‡                 | -0.47 (-0.72, -0.21) ‡                               |

\*Adjusted for age, gender, race & site

\*\*Adjusted for age, gender, race, site, SBP, DBP & HTN meds

\*\*\*Adjusted for age, gender, race, site, SBP, DBP, HTN meds, DM, smoking, LDL, HDL, prevalent CHD & prevalent HF

† Adjusted for age, gender, race, site, HTN meds, DM, smoking, LDL, HDL, prevalent CHD, prevalent HF and MAP.

‡p < 0.05

**Table 2. Association of Rapid Kidney Function Decline by eGFRcr (CKD Epi) with PWV & pulse pressure.**

| PWV                     | N    | # rapid decline (%) | Unadjusted        | Demo adjusted*    | BP adjusted**     | Fully adjusted*** | †MAP adjusted (no SBP, DBP) |
|-------------------------|------|---------------------|-------------------|-------------------|-------------------|-------------------|-----------------------------|
|                         |      |                     | OR (95% CI)                 |
| <b>Continuous</b>       |      |                     |                   |                   |                   |                   |                             |
| Log transformed         | 2057 | 257 (13%)           | 1.53 (1.09, 2.14) | 1.33 (0.94, 1.89) | 1.14 (0.79, 1.64) | 1.02 (0.70, 1.49) | 1.09 (0.75, 1.59)           |
| <b>Quartiles</b>        |      |                     |                   |                   |                   |                   |                             |
| <642                    | 525  | 54 (10%)            | 1.00 (ref)                  |
| 642-808                 | 529  | 62 (12%)            | 1.20 (0.81, 1.78) | 1.08 (0.73, 1.61) | 1.03 (0.69, 1.54) | 1.02 (0.68, 1.53) | 1.02 (0.68, 1.54)           |
| 809-1052                | 507  | 66 (13%)            | 1.40 (0.95, 2.06) | 1.19 (0.79, 1.77) | 1.07 (0.71, 1.61) | 1.00 (0.66, 1.52) | 1.02 (0.67, 1.54)           |
| >1052                   | 496  | 75 (15%)            | 1.58 (1.08, 2.31) | 1.33 (0.90, 1.97) | 1.15 (0.77, 1.72) | 1.02 (0.67, 1.54) | 1.08 (0.72, 1.63)           |
| <b>Pulse Pressure‡</b>  |      |                     |                   |                   |                   |                   |                             |
| Continuous (per 10mmHg) | 2057 | 257 (13%)           | 1.18 (1.10, 1.27) | 1.18 (1.10, 1.27) | 1.17 (1.09, 1.26) | 1.17 (1.08, 1.26) | 1.15 (1.06, 1.25)           |
| <b>Quartiles</b>        |      |                     |                   |                   |                   |                   |                             |
| <53                     | 529  | 52 (10%)            | 1.00 (ref)                  |
| 53-62                   | 503  | 45 (9%)             | 0.84 (0.55, 1.28) | 0.84 (0.55, 1.30) | 0.76 (0.47, 1.23) | 0.64 (0.39, 1.03) | 0.73 (0.47, 1.14)           |
| 63-75                   | 564  | 75 (13%)            | 1.40 (0.95, 2.04) | 1.41 (0.96, 2.08) | 1.17 (0.69, 2.00) | 0.93 (0.54, 1.61) | 1.21 (0.81, 1.81)           |
| >75                     | 461  | 85 (18%)            | 2.00 (1.38, 2.91) | 2.08 (1.42, 3.05) | 1.46 (0.65, 3.24) | 1.02 (0.45, 2.32) | 1.66 (1.08, 2.55)           |

\*Adjusted for age, gender, race & site

\*\*Adjusted for age, gender, race, site, SBP, DBP & HTN meds

\*\*\*Adjusted for age, gender, race, site, SBP, DBP, HTN meds, DM, smoking, LDL, HDL, prevalent CHD & prevalent HF

† Adjusted for age, gender, race, site, HTN meds, DM, smoking, LDL, HDL, prevalent CHD, prevalent HF and MAP.

‡ not adjusted for SBP & DBP in models

**Table 3. Association of Incident CKD by eGFR<sub>vr</sub> (CKD Epi) with PWV & pulse pressure.**

**Incident CKD is defined as eGFR-Cr<sub>≥60</sub> at baseline and eGFR-Cr < 60 at exams 3 or 10 and KF decline by eGFR-Cr >1**

| PWV                     | N    | # inc CKD (%) | Unadjusted        | Demo adjusted*    | BP adjusted**     | Fully adjusted*** | †MAP adjusted (no SBP, DBP) |
|-------------------------|------|---------------|-------------------|-------------------|-------------------|-------------------|-----------------------------|
|                         |      |               | IRR (95% CI)                |
| <b>Continuous</b>       |      |               |                   |                   |                   |                   |                             |
| Log transformed         | 1502 | 329 (22%)     | 1.17 (0.92, 1.48) | 1.11 (0.87, 1.43) | 1.05 (0.82, 1.34) | 1.02 (0.79, 1.30) | 1.03 (0.80, 1.33)           |
| <b>Quartiles</b>        |      |               |                   |                   |                   |                   |                             |
| <642                    | 402  | 78 (19%)      | 1.00 (ref)                  |
| 642-808                 | 393  | 84 (24%)      | 1.28 (0.99, 1.65) | 1.23 (0.95, 1.58) | 1.21 (0.93, 1.56) | 1.21 (0.94, 1.57) | 1.22 (0.94, 1.58)           |
| 809-1052                | 352  | 85 (24%)      | 1.33 (1.02, 1.73) | 1.23 (0.94, 1.60) | 1.19 (0.91, 1.55) | 1.18 (0.90, 1.55) | 1.19 (0.90, 1.56)           |
| >1052                   | 355  | 72 (20%)      | 1.18 (0.90, 1.56) | 1.12 (0.85, 1.49) | 1.07 (0.81, 1.41) | 1.04 (0.78, 1.37) | 1.06 (0.80, 1.40)           |
| <b>Pulse Pressure‡</b>  |      |               |                   |                   |                   |                   |                             |
| Continuous (per 10mmHg) | 1502 | 329 (22%)     | 1.06 (1.01, 1.12) | 1.05 (1.00, 1.11) | 1.03 (0.98, 1.09) | 1.03 (0.98, 1.09) | 1.04 (0.99, 1.11)           |
| <b>Quartiles</b>        |      |               |                   |                   |                   |                   |                             |
| <53                     | 385  | 79 (21%)      | 1.00 (ref)                  |
| 53-62                   | 373  | 72 (19%)      | 1.05 (0.94, 1.18) | 1.04 (0.92, 1.16) | 0.96 (0.84, 1.10) | 0.96 (0.84, 1.10) | 1.00 (0.89, 1.13)           |
| 63-75                   | 413  | 97 (24%)      | 1.01 (0.90, 1.23) | 0.95 (0.85, 1.06) | 0.85 (0.72, 1.00) | 0.85 (0.72, 1.01) | 0.91 (0.81, 1.03)           |
| >75                     | 331  | 81 (25%)      | 1.28 (1.14, 1.41) | 1.17 (1.04, 1.31) | 0.91 (0.70, 1.18) | 0.91 (0.69, 1.19) | 1.04 (0.91, 1.18)           |

\*Adjusted for age, gender, race & site

\*\*Adjusted for age, gender, race, site, SBP, DBP & HTN meds

\*\*\*Adjusted for age, gender, race, site, SBP, DBP, HTN meds, DM, smoking, LDL, HDL, prevalent CHD, prevalent HF & BL eGFR-cysC

† Adjusted for age, gender, race, site, HTN meds, DM, smoking, LDL, HDL, prevalent CHD, prevalent HF, BL eGFR cysC and MAP.

‡ not adjusted for SBP & DBP in models
