# Supplementary material
Source: PubMed Central journal article supplement (PMC3586973)
Supplement: CJN.07900812_CJN07900812SupplementaryData1.pdf [file CJN.07900812_CJN07900812SupplementaryData1.pdf]

**Magdalena Madero MD<sup>1</sup>** *Department of Medicine, Division of Nephrology, National Heart Institute, México City, Mexico*

**Carmen Peralta MD, MAS<sup>2,3</sup>** *Department of Medicine, University of California at San Francisco, San Francisco, California and San Francisco VA Medical Center*

**Ronit Katz D Phil<sup>4</sup>** *Department of Biostatistics University of Washington, Seattle*

**Robert Canada MD<sup>5</sup>** *University of Tennessee Health Science Center, Memphis, Tennessee*

**Linda Fried MD<sup>6,7</sup>** *Renal-Electrolyte Division, University of Pittsburgh School of Medicine, and Renal Section, VA Pittsburgh Healthcare System, Pittsburgh, Pennsylvania*

**Samer Najjar MD<sup>8</sup>** *Med Star Health Research Institute, Washington Hospital Center, Washington DC*

**Michael Shlipak MD, MPH<sup>2,3</sup>** *Division of General Internal Medicine San Francisco VA Medical Center, Departments of Medicine, Epidemiology & Biostatistics University of California, San Francisco*

**Eleanor Simonsick MD,<sup>9</sup>** *Intramural Research Program, National Institute on Aging, Baltimore, MD*

**Edward Lakatta MD<sup>10</sup>** *Intramural Research Program, National Institute on Aging, Baltimore, MD*

**Kushang Patel PhD<sup>11</sup>** *Department of Anesthesiology and Pain Medicine, University of Washington, Seattle.*

**Dena Rifkin MD, MS<sup>12</sup>** *Division of Nephrology, Department of Medicine, Division of Preventive Medicine, Department of Family and Preventive Medicine, University of California, San Diego, Veterans' Affairs Hospital, San Diego*

**Marquis Hawkins PhD<sup>13</sup>** *Department of Epidemiology, Graduate School of Public Health, University of Pittsburgh*

**Anne Newman MD, MPH.<sup>13</sup>** *Department of Epidemiology, Graduate School of Public Health, University of Pittsburgh,*

**Mark Sarnak MD, MS<sup>14</sup>** *Department of Medicine, Division of Nephrology, Tufts Medical Center, Boston, Massachusetts*

For the Health ABC Study
